# Supplementary material for: Maternal DNA Methylation Regulates Early Trophoblast Development
Source: PubMed Central journal article supplement (PMC4729543; doi:10.1016/j.devcel.2015.12.027), 2016-01-25
Supplement: mmc1.pdf [file mmc1.pdf]

**Developmental Cell, Volume 36**

**Supplemental Information**

**Maternal DNA Methylation Regulates**

**Early Trophoblast Development**

**Miguel R. Branco, Michelle King, Vicente Perez-Garcia, Aaron B. Bogutz, Matthew Caley, Elena Fineberg, Louis Lefebvre, Simon J. Cook, Wendy Dean, Myriam Hemberger, and Wolf Reik**

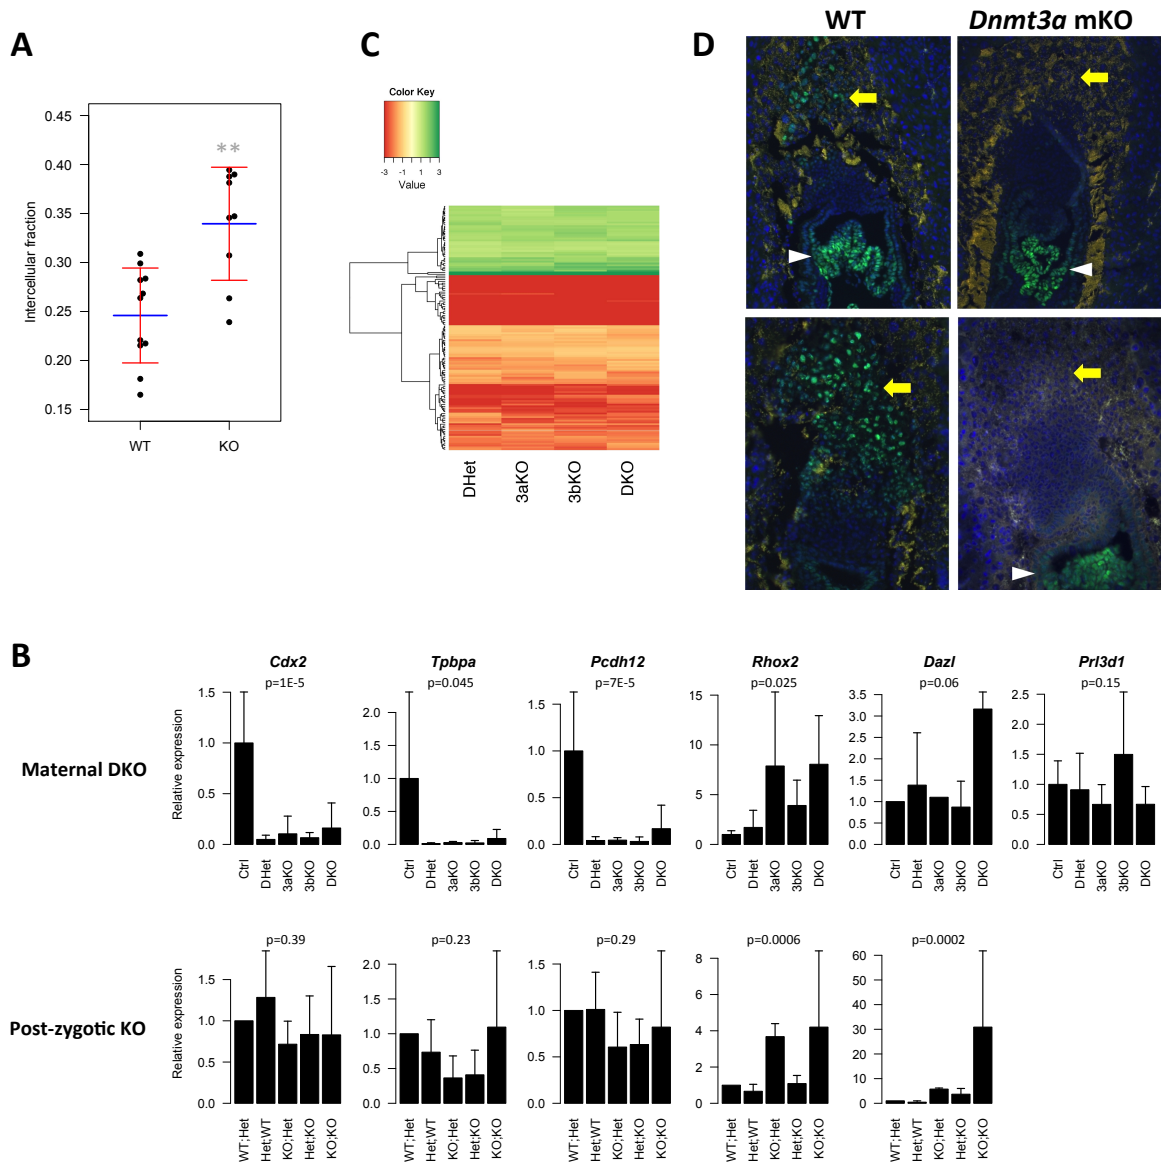

**Figure S1 (related to Figure 1) – Gene expression alterations in *Dnmt3* KO EPCs.** A) The amount of extracellular space at the TGC layer was measured from histological sections (Fig. 1C) and normalised to the total area, showing that *Dnmt3a* mKO trophoblast sections show significantly increased in spacing between cells (\*\* $p < 0.01$ , t-test). B) RT-qPCR analysis in oocyte and post-zygotic *Dnmt3* deletion E7.5 EPCs. Post-zygotic deletion was generated by crossing mice heterozygous for both *Dnmt3* genes; genotypes under each bar refer to *Dnmt3a* and *Dnmt3b*, respectively (e.g., Het;KO signifies *Dnmt3a*<sup>+/-</sup>;*Dnmt3b*<sup>-/-</sup>). P-values refer to the effect of genotype as analysed by ANOVA. C) Expression differences to Ctrl EPCs across all mDKO DE genes. Log<sub>2</sub> fold changes in each mDKO genotype relative to Ctrl EPCs are displayed as a heatmap. D) Immunofluorescence for CDX2 (green) in two sections from E7.5 wildtype or *Dnmt3a* mKO conceptuses. Sections were counterstained with DAPI (blue). Yellow staining is from autofluorescence of blood cells. In the wildtype, expression of CDX2 is visible both in the extraembryonic ectoderm (white arrowhead), where the TSC niche lies, and in the EPC (yellow arrow). In *Dnmt3a* mKO expression of CDX2 is specifically lost in the EPC, remaining high in the extraembryonic ectoderm. Error bars represent standard deviations.

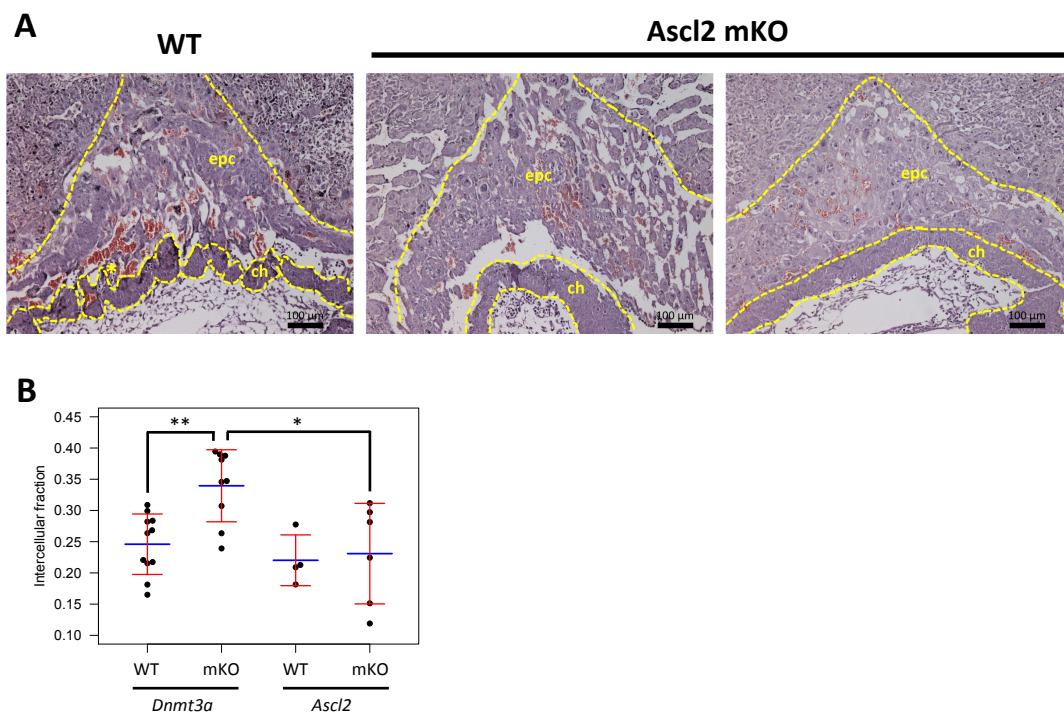

**Figure S2 (related to Figure 2) – Histological analysis of *Ascl2* mKO E9.5 trophoblast.** A) Hematoxylin and eosin staining of paraffin sections shows that *Ascl2* mKO trophoblast lacks the labyrinthine layer that is otherwise seen developing in WT trophoblast (marked by an asterisk); the TGC layer is expanded but, unlike *Dnmt3a* mKOs, does not have a pronounced reduction in tissue density when compared to WT TGCs; ch – chorion, epc – ectoplacental cone. B) The amount of extracellular space at the TGC layer was measured and normalised to the total area, showing that *Ascl2* mKO sections do not have increased spacing between cells. \* $p < 0.05$ , \*\* $p < 0.01$  – ANOVA followed by post-hoc tests comparing *Dnmt3a* mKO with other genotypes. Error bars represent standard deviations.

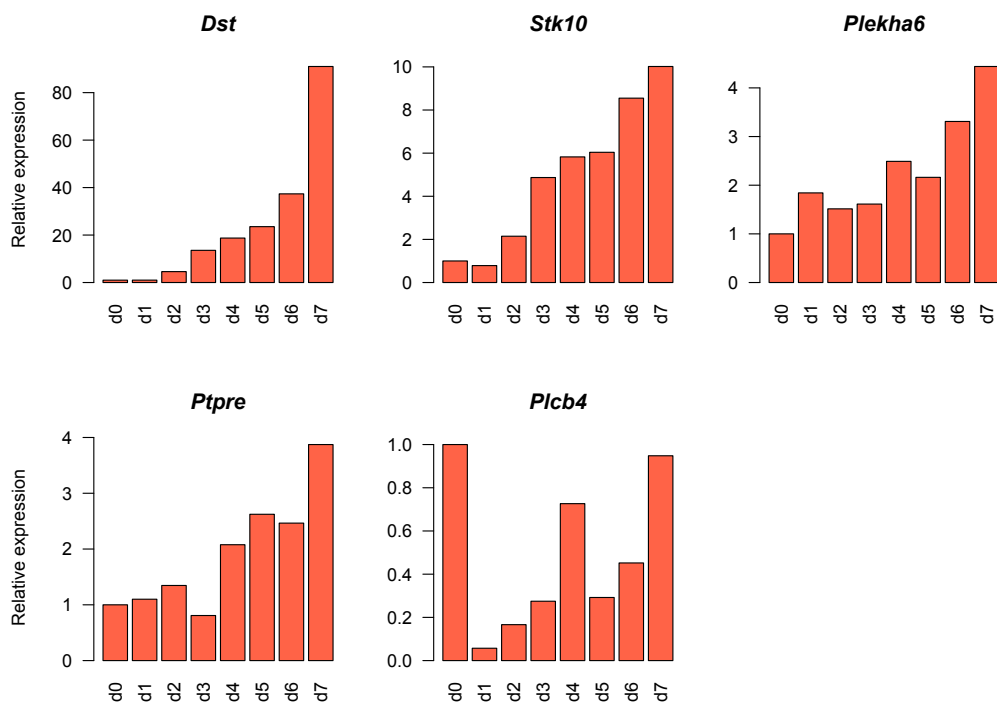

**Figure S3 (related to Figure 3) – RT-qPCR analysis of *Dnmt3* mDKO DE genes during TSC differentiation.** TSCs were differentiated *in vitro* for 7 days. Genes with increased expression during *in vivo* differentiation (Fig. 3A) also show a differentiation-dependent profile *in vitro*.

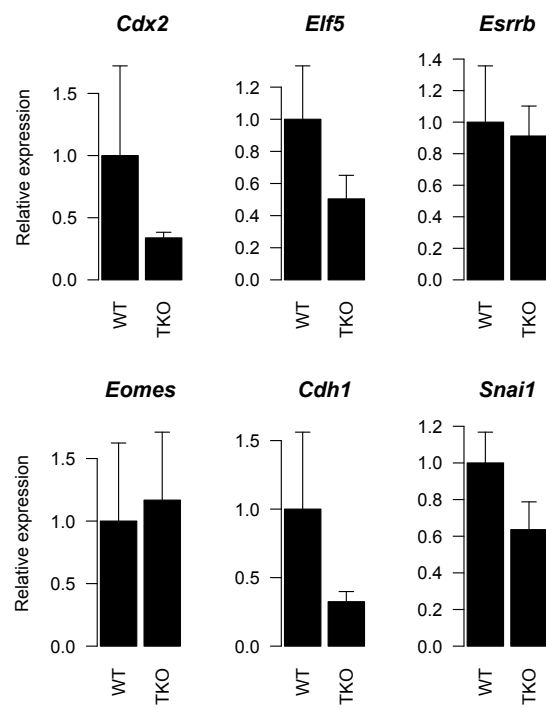

**Figure S4 (related to Figure 4) – Additional RT-qPCR analysis of TKO TSCs.** TKO TSCs show no significant differences in the expression of key TSC markers (*Cdx2*, *Elf5*, *Esrrb*, *Eomes*) or the EMT markers *Cdh1* and *Snai1*. Error bars represent standard deviations.

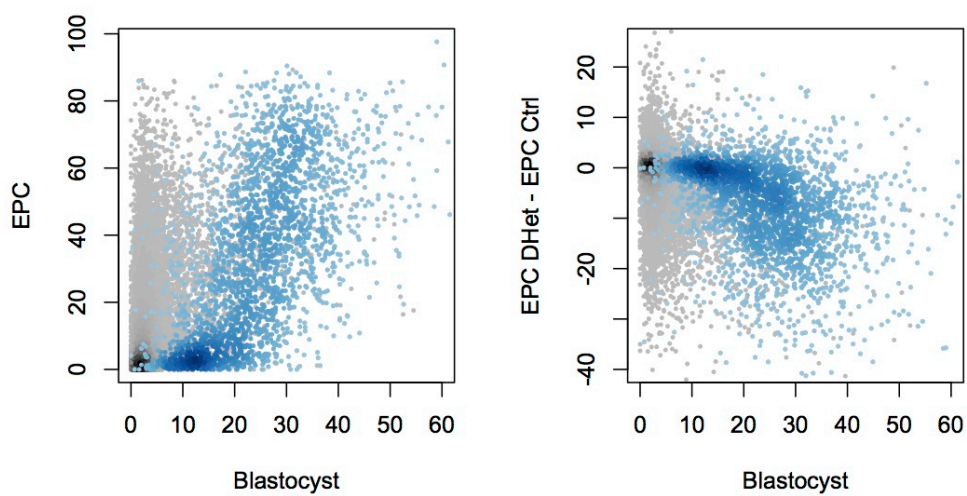

**Figure S5 (related to Figure 5) – Hypomethylation in DHet embryos is not preferentially derived from reprogramming-resistant loci.** Blastocyst methylation data at CGIs (Kobayashi et al. 2012) was plotted against methylation levels in Ctrl EPCs (left) or the difference between DHet and Ctrl EPCs (right). CGIs with more than 50% methylation in oocytes are highlighted in blue and show that nearly all CGIs methylated in blastocyst are carried over from the oocyte. However, EPCs display de novo methylated CGIs as well. Hypomethylation in DHet EPCs occurs in both reprogramming-resistant and de novo methylated CGIs.

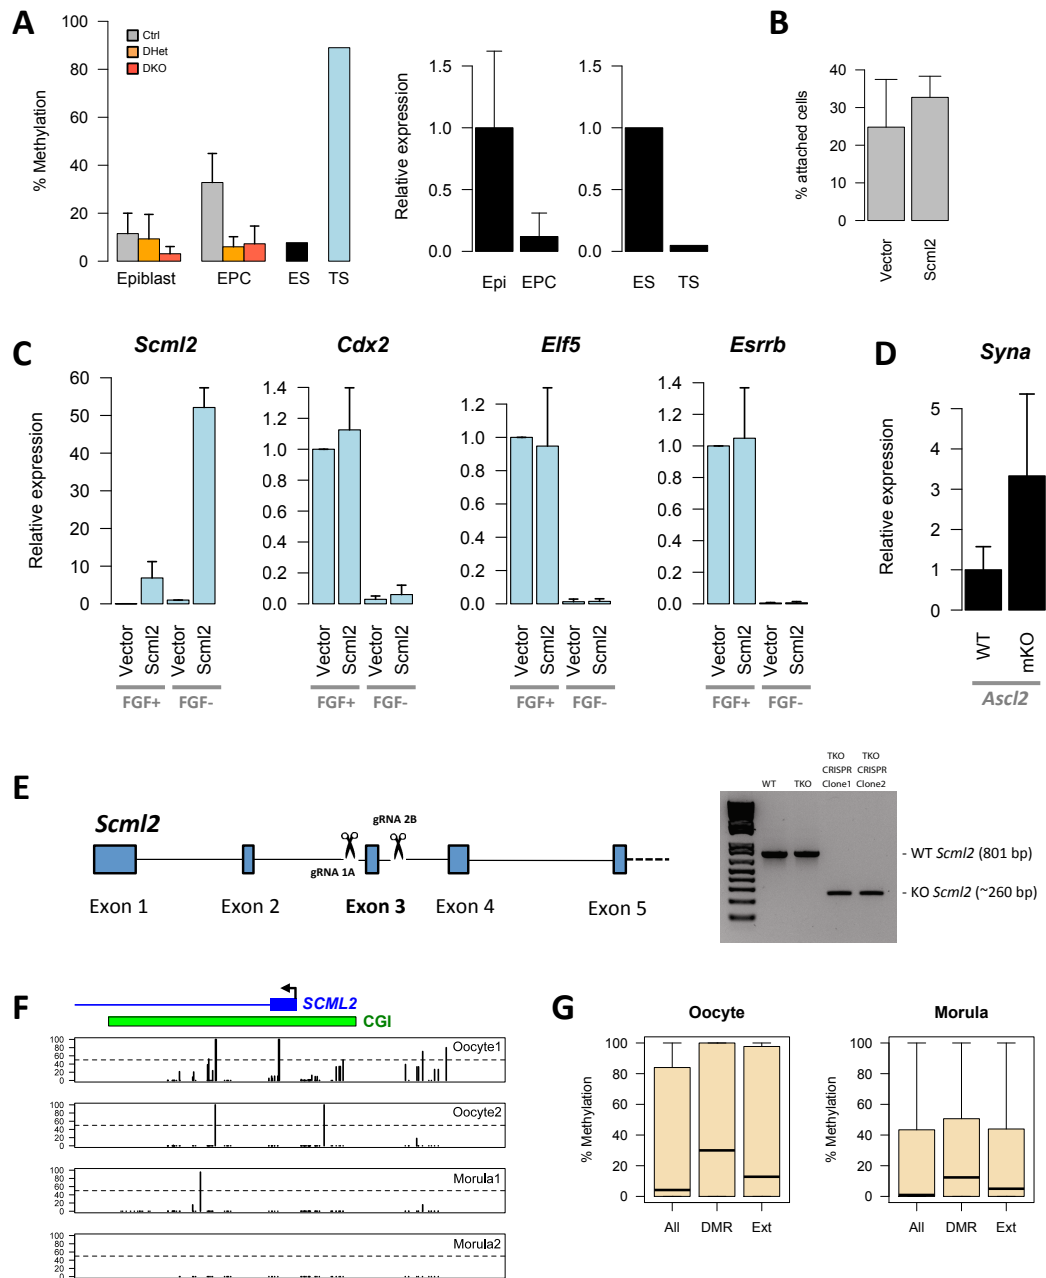

**Figure S6 (related to Figure 6) – *Scml2* regulation and role in early development.** A) *Scml2* methylation (left; amplicon CpGs 8-10) and expression (right) show asymmetry between E7.5 EPC and epiblast, and between TSCs and ESCs. B) Measurement of TSC adhesion to uncoated tissue culture wells shows that *Scml2* overexpression is insufficient to drive adhesion defects. C) Additional RT-qPCRs in *Scml2*-overexpressing TSCs, grown under stem cell (FGF+) or differentiation (FGF-) conditions. D) *Syna* expression in WT and *Ascl2* mKO E7.5 EPCs. E) CRISPR/Cas9 strategy for knocking out *Scml2* in TKO TSCs and corresponding genotyping PCRs. F) DNA methylation in human oocytes and morulae (Guo et al. 2014) at the syntenic region to the *Scml2*-associated DMR; no methylation is seen in morulae. G) Comparison of CpG methylation between the whole genome ('All'), at regions of synteny with all mDKO DMRs ('DMR') and at DMR regions extended up to 400bp to include adjacent genomic regions ('Ext'). Overall, mDKO DMRs are hypermethylated in human oocytes and morulae; extending the DMRs dampens the difference, demonstrating local specificity of the hypermethylation. Bar plot error bars represent standard deviations.

## SUPPLEMENTARY TABLES

**Table S1 (related to Figure 1) – Differentially expressed genes in all mDKO genotypes versus Ctrl EPCs.** Log2 fold-change and p values refer to the comparison of DHet with Ctrl EPCs. P values are corrected for multiple comparisons. Genes that are also differentially expressed in Ascl2 mKO EPCs are indicated.

**Table S2 (related to Figure 2) – Gene ontology terms associated with Dnmt3-specific DE genes.** The top 20 significant GO terms are shown. Benjamini-Hochberg correction of p values was applied.

| GO ID      | GO Term                                                 | n Genes | Enrichment | p value  |
|------------|---------------------------------------------------------|---------|------------|----------|
| GO:0043087 | regulation of GTPase activity                           | 13      | 9.49       | 6.80E-06 |
| GO:0033124 | regulation of GTP catabolic process                     | 13      | 9.42       | 6.80E-06 |
| GO:0032318 | regulation of Ras GTPase activity                       | 11      | 11.58      | 7.20E-06 |
| GO:0030811 | regulation of nucleotide catabolic process              | 13      | 8.61       | 7.20E-06 |
| GO:0033121 | regulation of purine nucleotide catabolic process       | 13      | 8.61       | 7.20E-06 |
| GO:0009118 | regulation of nucleoside metabolic process              | 13      | 8.55       | 7.20E-06 |
| GO:0046578 | regulation of Ras protein signal transduction           | 12      | 8.89       | 1.20E-05 |
| GO:0007265 | Ras protein signal transduction                         | 13      | 8.02       | 1.20E-05 |
| GO:1900542 | regulation of purine nucleotide metabolic process       | 14      | 7.14       | 1.20E-05 |
| GO:0006140 | regulation of nucleotide metabolic process              | 14      | 7.07       | 1.20E-05 |
| GO:0051056 | regulation of small GTPase mediated signal transduction | 12      | 8.45       | 1.90E-05 |
| GO:0006184 | GTP catabolic process                                   | 13      | 6.63       | 7.00E-05 |
| GO:1901069 | guanosine-containing compound catabolic process         | 13      | 6.57       | 7.00E-05 |
| GO:0046039 | GTP metabolic process                                   | 13      | 6.50       | 7.00E-05 |
| GO:0023051 | regulation of signaling                                 | 27      | 3.01       | 7.00E-05 |
| GO:0010646 | regulation of cell communication                        | 27      | 3.00       | 7.00E-05 |
| GO:1901068 | guanosine-containing compound metabolic process         | 13      | 6.37       | 8.20E-05 |
| GO:0009966 | regulation of signal transduction                       | 25      | 3.14       | 8.60E-05 |
| GO:0031329 | regulation of cellular catabolic process                | 14      | 5.60       | 0.00011  |
| GO:0009653 | anatomical structure morphogenesis                      | 25      | 3.09       | 0.00011  |



**Table S3 (related to Figure 2) – Gene ontology terms associated with Ascl2-specific DE genes.** The top 20 significant GO terms are shown. Benjamini-Hochberg correction of p values was applied.

| GO ID      | GO Term                                            | n Genes | Enrichment | p value  |
|------------|----------------------------------------------------|---------|------------|----------|
| GO:0048583 | regulation of response to stimulus                 | 65      | 2.21       | 3.70E-06 |
| GO:0044699 | single-organism process                            | 185     | 1.30       | 2.20E-05 |
| GO:0051239 | regulation of multicellular organismal process     | 51      | 2.19       | 0.00012  |
| GO:0048731 | system development                                 | 72      | 1.86       | 0.00012  |
| GO:0051179 | localization                                       | 87      | 1.72       | 0.00012  |
| GO:0044763 | single-organism cellular process                   | 168     | 1.32       | 0.00012  |
| GO:0044765 | single-organism transport                          | 62      | 1.96       | 0.00018  |
| GO:0009966 | regulation of signal transduction                  | 50      | 2.15       | 0.00024  |
| GO:0023051 | regulation of signaling                            | 53      | 2.02       | 0.00052  |
| GO:0010646 | regulation of cell communication                   | 53      | 2.01       | 0.00052  |
| GO:0007275 | multicellular organismal development               | 77      | 1.72       | 0.00052  |
| GO:0009611 | response to wounding                               | 25      | 3.09       | 0.00062  |
| GO:0048519 | negative regulation of biological process          | 68      | 1.78       | 0.00062  |
| GO:0048518 | positive regulation of biological process          | 74      | 1.72       | 0.00062  |
| GO:0006810 | transport                                          | 70      | 1.74       | 0.00088  |
| GO:2000026 | regulation of multicellular organismal development | 36      | 2.35       | 0.00093  |
| GO:0050793 | regulation of developmental process                | 42      | 2.18       | 0.00093  |
| GO:0044767 | single-organism developmental process              | 82      | 1.63       | 0.00093  |
| GO:0050896 | response to stimulus                               | 121     | 1.42       | 0.00093  |
| GO:0032502 | developmental process                              | 82      | 1.62       | 0.00095  |

## SUPPLEMENTARY EXPERIMENTAL MATERIALS

### Primers

| Target         | Primer pair sequences                                |
|----------------|------------------------------------------------------|
| <b>RT-qPCR</b> |                                                      |
| Ascl2          | AGCCCGATGGAGCAGGAG<br>CCGAGCAGAGGTCAGTCAGC           |
| Atp5b          | GGCCAAGATGTCCTGCTGTT<br>GCTGGTAGCCTACAGCAGAAGG       |
| Cdh1           | TGACTCGAAATGATGTGGCT<br>GCTGCCTTCAGGTTTTTCATC        |
| Cdh2           | CTTCAGGCGTCTGTGGA<br>CTGAATTTACATTGAGAAGGG           |
| Cdx2           | AGTGAGCTGGCTGCCACACT<br>GCTGCTGCTGCTTCTTCTTGA        |
| Cebpa          | TGGACAAGAACAGCAACGAG<br>TCACTGGTCAACTCCAGCAC         |
| Dazl           | CTTACATGCAGCCTCCAACC<br>GCGGTGGCATCTGGTAGTTA         |
| Dst            | ATTCAAGAGTTCATGGACCTACG<br>CCCGTGCTCAGAATTCTCTTTA    |
| Elf5           | ATTCGCTCGCAAGGTTACTCC<br>GGATGCCACAGTTCTCTTCAGG      |
| Eomes          | CCTGGTGGTGTGTTTTGTTGTG<br>TTTAATAGCACCGGGCACTC       |
| Esrrb          | AGTACAAGCGACGGCTGGAT<br>CCTAGTAGATTCGAGACGATCTTAGTCA |
| Itga7          | CTGCTGTGGAAGCTGGGATT<br>CTCCTCCTTGAAGTCTGTCG         |
| Hspcb          | GCTGGCTGAGGACAAGGAGA<br>CGTCGGTTAGTGGAAATCTTCATG     |
| Pcdh12         | GAAGAGCTGTCGAGCCTGTT<br>GTGAGGGGCAATGACAATCT         |
| Pl1            | GACATTAAGGGCAGAAACCTTG<br>GTCCAGACCAAGCAGGGTAG       |
| Plcb4          | TAGAGGATGAGCAAGCATGG<br>TGAATATTGCGCTCTTCAGC         |
| Plekha6        | GTGAAAGGAGTTAGAGGCAGCA<br>GTGGACAGAAGGGCTCCAT        |
| Ptpre          | CCCACGACCCTCCCT<br>CAAGGGGAAATGAGGGCTA               |
| Rhox2          | AGAGCTTCAATGTGCTGCAA<br>CAAAAACCATTCCTGCACTG         |
| Scml2          | ATCTTCCCAGTTGGATGGTG<br>CTGGGGCCTCTTCTTCATT          |
| Snai1          | GAGTTGACTACCGACCTTGC<br>AAGGTGAACTCCACACACG          |
| Snai2          | CATTAGAACTCACACTGGGGAA<br>TTTACATCAGAGTGGGTCTGC      |
| Spry1          | GGTCATAGGTCAGATCGGGTC<br>CTTGCCCACTGTTTCGAG          |
| Stk10          | ACACCCTCCAAGTGGTCTGT<br>GAGCCTTATTGCTGGTGACTCT       |
| SynA           | CCTCACCTCCCAGGCCCTC<br>GGCAGGGAGTTTGCCACGA           |
| SynB           | TCCGAAAAGGGACCTGCCA<br>CAGCAGTAGTGCGGGGTGCC          |
| Tpbpa          | CGGAAGGCTCCAACATAGAA<br>GGCTGTGGTTTTGTTTCCTC         |
| Twist1         | AGACCTAGATGTCATTGTTCCAGA<br>TTGTGAATTTGGTCTCTGCTCT   |

---

|        |                                                   |
|--------|---------------------------------------------------|
| Twist2 | TCTCAGCTACGCCTTCTCC<br>TGAGATGTGCAGGTGGGT         |
| Zeb1   | GAGGTGACTCGAGCATTTAGAC<br>TCTGAATTTGCTTCTACCACAGT |
| Zeb2   | GGAGGAAAAACGTGGTGAAC<br>GGGTTTGCAAGGCTATCATC      |

---

**Sequenom**

|           |                                                                                           |
|-----------|-------------------------------------------------------------------------------------------|
| Scml2 TSS | AGGAAGAGAGGTATTTGGGGTAAAGTTTTAGGGG<br>CAGTAATACGACTCACTATAGGGAGAAGGCTTAAATCCTAAACTCAAACCC |
|-----------|-------------------------------------------------------------------------------------------|

---

**Genotyping**

|       |                                              |
|-------|----------------------------------------------|
| Scml2 | AGCACTTCTCCCTCCCTTTT<br>CAAGGCTCAAGGCAAAAATC |
|-------|----------------------------------------------|

---
